# Supplementary material for: A 3D-polyphenylalanine network inside porous alumina: Synthesis and characterization of an inorganic–organic composite membrane
Source: publisher site journal article supplement (doi:10.3762/bjnano.11.78), 2020-06-17
Supplement: Additional file 1 [file 2190-4286-11-78-S1.pdf]

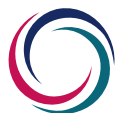

## Supporting Information

for

### **A 3D-polyphenylalanine network inside porous alumina: Synthesis and characterization of an inorganic–organic composite membrane**

Jonathan Stott and Jörg J. Schneider

*Beilstein J. Nanotechnol.* **2020**, *11*, 938–951. [doi:10.3762/bjnano.11.78](https://doi.org/10.3762/bjnano.11.78)

## Additional experimental data

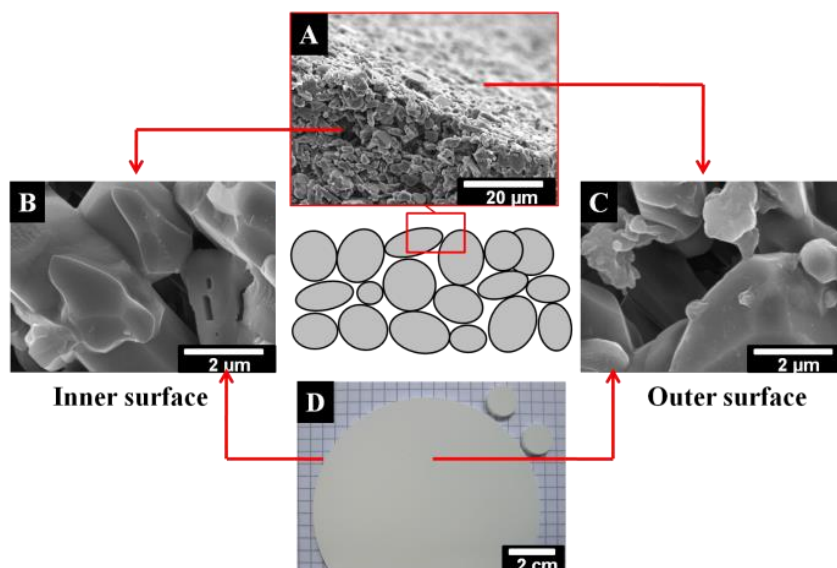

**Figure S1:**(A) SEM image of the edge of used ALOX-membranes. (B) SEM image of the inner surface, (C) SEM image of the outer surface and (D) photograph image of the ALOX-membranes. (Center) schematic of the ALOX-membrane morphology with their pore geometry.

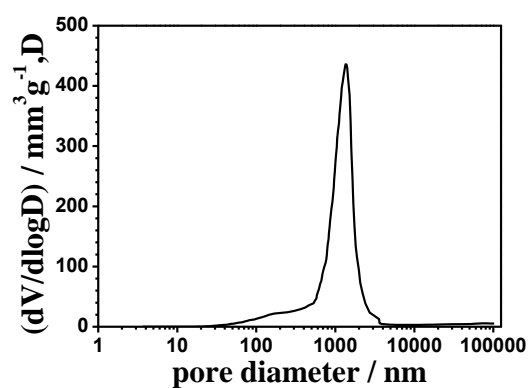

**Figure S2:** Hg-porosimetric measurement of a neat ALOX-membrane.

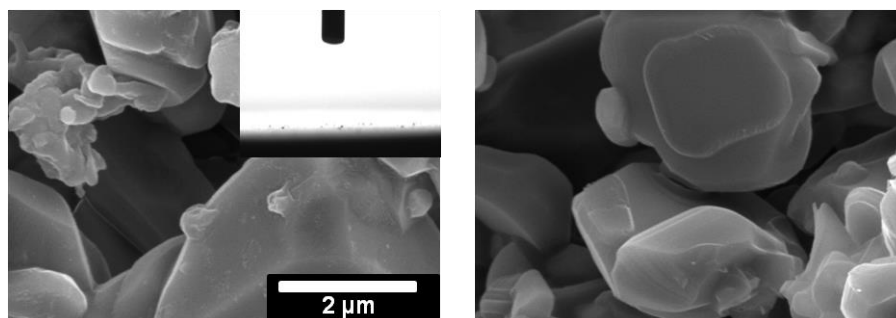

**Figure S3:** SEM image and water contact angle (2  $\mu$ L drop size) of the outer surface of neat ALOX-membrane (left). SEM image of the inner surface of the ALOX-membrane.

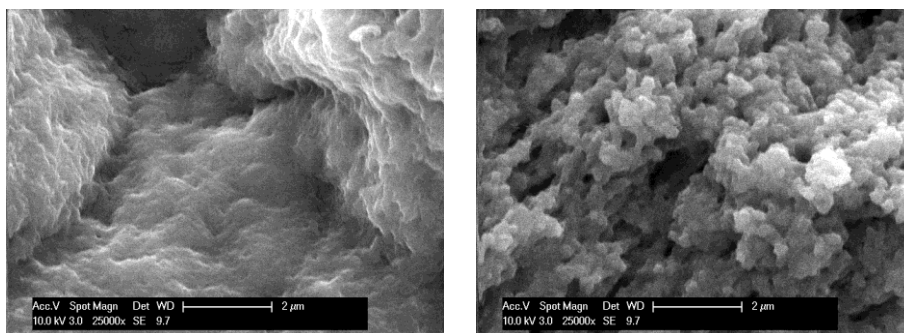

Figure S4: SEM images of polyphenylalanine synthesized in solution of pure DCM (left) and pure THF (right).

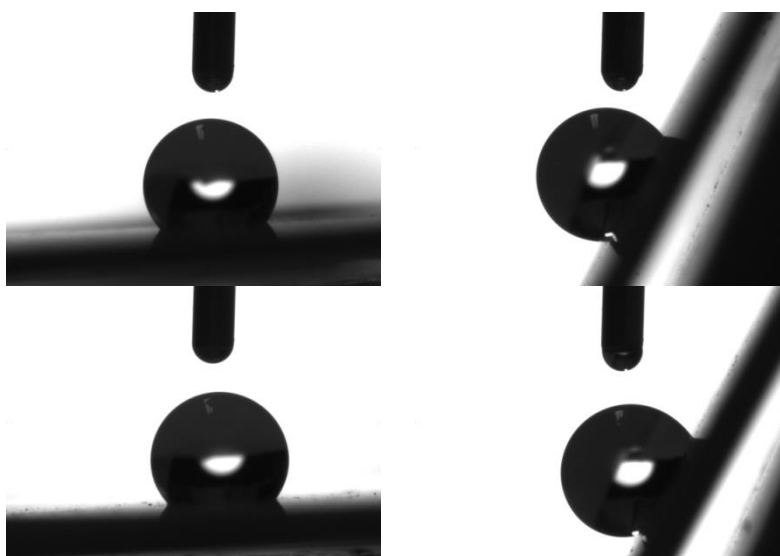

Figure S5: Water contact angles at flat orientation and tilted orientation of the pPA-functionalized ALOX-membrane.

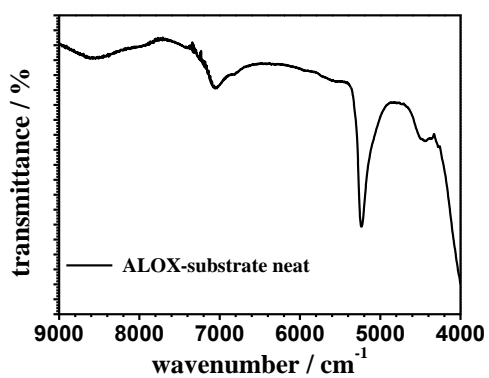

Figure S6: NIR-spectrum of neat ALOX-membrane (as achieved).

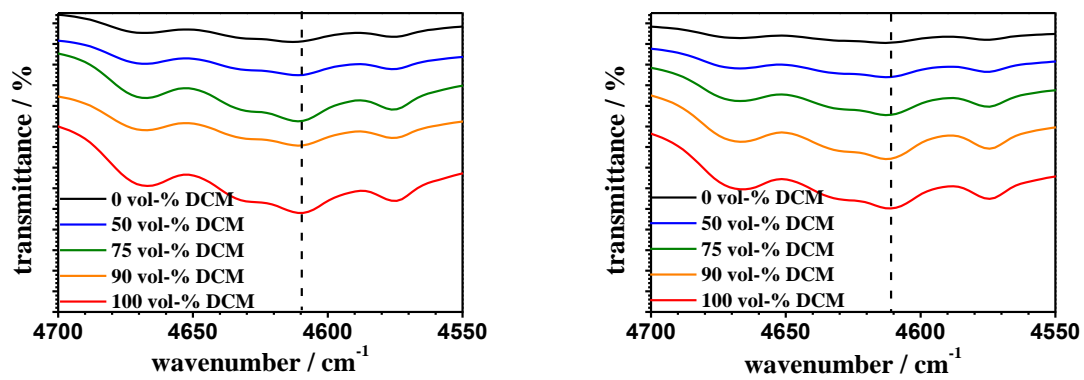

**Figure S7:** NIR spectra of the polyphenylalanine functionalized ALOX-membranes from different solvent mixtures before (left) and after (right) treatment with  $\text{CHCl}_3/\text{DCA}$  solvent mixture at different wavenumber regions after the grafting process. Dotted line indicates the maxima of the combination band at 4611 respectively 4610  $\text{cm}^{-1}$  of the polyphenylalanine functionalized membrane from pure DCM.
